# Supplementary material for: Cost-effective scat-detection dogs: unleashing a powerful new tool for international mammalian conservation biology
Source: PubMed Central journal article supplement (PMC5056371; doi:10.1038/srep34758), 2016-10-10
Supplement: srep34758-s1.pdf [file srep34758-s1.pdf]

Title: Cost-effective scat-detection dogs: unleashing a powerful new tool for international mammalian conservation biology

Authors: Joseph D. Orkin<sup>1,2</sup>, Yuming Yang<sup>3</sup>, ChunyanYang<sup>1</sup>, Douglas W. Yu<sup>1,4</sup>, Xuelong Jiang<sup>1\*</sup>

## SUPPLEMENTARY INFORMATION

### SUPPLEMENTAL METHODS

Following basic obedience skills, scat-detection training ensued by incrementally increasing the complexity of search-related tasks over time to receive a reward. We began by heightening Pinkerton's possessive instinct; this was done by repeatedly teasing him with a tennis ball or rolled towel. Once a desire for these objects was formed in Pinkerton's mind, we began placing these objects in close proximity to the zoo scats. Next, scats were placed in easy to locate places; when Pinkerton expressed interest in them, he was rewarded with the aforementioned toys or food treats. Pinkerton was then instructed to lie down with his paws on either side of a scat after he had smelled it in order to receive his reward.

Once Pinkerton achieved a basic level of detection ability—the capacity to identify a target species scat by lying beside it to receive a reward—we increased the difficulty of finding target scat. We began with a “Multiple Block Test,” in which we hid Pinkerton's toy or primate scat underneath one of several sequentially aligned cinder blocks (Figure S1). This test allows for a small amount of uncertainty: the dog observes the handler placing scat in one of four places within a small, circumscribed area, but it does not know which. By hiding the scat underneath a cinderblock, the dog cannot rely on visual cues and must identify it by smell alone. Only when Pinkerton had lain down with paws beside the correct cinderblock was he rewarded for proper identification. Secondly, we trained Pinkerton with a “Large Area Test,” in which we hid one to five scats randomly in an open field without the dog observing the locations. Pinkerton would be

given a command to commence searching, while the handler trailed several meters behind him, remaining within sight of the dog at all times. The large area test was then increased in complexity by moving into more complex terrain (e.g. forest) and only rewarding the dog upon his identification of multiple target scats.

## SUPPLEMENTAL TABLES

**Table S1:** Primers used for genetic identification of fecal samples.

| Taxon                               | Locus  | Length (bp) | Primer name | Primer sequence            |
|-------------------------------------|--------|-------------|-------------|----------------------------|
| <i>Nomascus</i>                     | d-loop | 600         | GDL-L1 F    | CGAAAACAAAATACTCAAATGAACCT |
|                                     |        |             | GDL-H2 R    | GGTGATCCATCGTGATGTCTTATT   |
| Trachypithecus and<br><i>Macaca</i> | d-loop | 749         | TP-DL-L1 F  | ACTACCATTAGCCTCCCTAATCG    |
|                                     |        |             | TP-DL-H2 R  | GATATTGATTTACGGAGGATGG     |
| Vertebrates                         | CO1    | 220         | CO1-220-F   | TAYTACGTTGTAGCCCACTCCAC    |
|                                     |        |             | CO1-220-R   | GGGTAGTCCGAGTAWCGTCG       |

**Table S2:**

| Genbank<br>Accession | Organism                 | Isolate                           | Haplotype |
|----------------------|--------------------------|-----------------------------------|-----------|
| TBD                  | <i>Nomascus concolor</i> | South China Wuliang Mountain      | BWI01     |
| TBD                  | <i>Nomascus concolor</i> | South China Wuliang Mountain      | BWI03     |
| TBD                  | <i>Nomascus concolor</i> | South China Wuliang Mountain      | BWI05     |
| TBD                  | <i>Nomascus concolor</i> | South China Yongde Daxue Mountain | YDX201    |
| TBD                  | <i>Nomascus concolor</i> | South China Yongde Daxue Mountain | YDX408    |
| TBD                  | <i>Nomascus concolor</i> | South China Wuliang Mountain      | XNC20     |
| TBD                  | <i>Nomascus concolor</i> | South China Wuliang Mountain      | XNC17     |
| TBD                  | <i>Nomascus concolor</i> | South China Wuliang Mountain      | XNC16     |
| TBD                  | <i>Nomascus concolor</i> | South China Wuliang Mountain      | XBH13     |
| TBD                  | <i>Nomascus concolor</i> | South China Wuliang Mountain      | XBH12     |
| TBD                  | <i>Nomascus concolor</i> | South China Wuliang Mountain      | XBH10     |
| TBD                  | <i>Nomascus concolor</i> | South China Wuliang Mountain      | XBH202    |
| TBD                  | <i>Nomascus concolor</i> | South China Wuliang Mountain      | XBH203    |

|     |                                   |                              |       |
|-----|-----------------------------------|------------------------------|-------|
| TBD | <i>Nomascus concolor</i>          | South China Wuliang Mountain | XBH07 |
| TBD | <i>Nomascus concolor</i>          | South China Wuliang Mountain | XBH06 |
| TBD | <i>Nomascus concolor</i>          | South China Wuliang Mountain | SNC14 |
| TBD | <i>Nomascus concolor</i>          | South China Wuliang Mountain | SNC11 |
| TBD | <i>Nomascus concolor</i>          | South China Wuliang Mountain | SNC10 |
| TBD | <i>Nomascus concolor</i>          | South China Wuliang Mountain | RML27 |
| TBD | <i>Nomascus concolor</i>          | South China Wuliang Mountain | HCL14 |
| TBD | <i>Nomascus concolor</i>          | South China Wuliang Mountain | HCL12 |
| TBD | <i>Nomascus concolor</i>          | South China Wuliang Mountain | HCL08 |
| TBD | <i>Nomascus concolor</i>          | South China Wuliang Mountain | HCL07 |
| TBD | <i>Nomascus concolor</i>          | South China Wuliang Mountain | HCL06 |
| TBD | <i>Nomascus concolor</i>          | South China Wuliang Mountain | HCL04 |
| TBD | <i>Nomascus concolor</i>          | South China Wuliang Mountain | HCL01 |
| TBD | <i>Nomascus concolor</i>          | South China Wuliang Mountain | HCB22 |
| TBD | <i>Nomascus concolor</i>          | South China Wuliang Mountain | HCB03 |
| TBD | <i>Trachypithecus crepusculus</i> | South China Wuliang Mountain | HCB13 |
| TBD | <i>Trachypithecus crepusculus</i> | South China Wuliang Mountain | HCB14 |
| TBD | <i>Trachypithecus crepusculus</i> | South China Wuliang Mountain | HCB17 |
| TBD | <i>Trachypithecus crepusculus</i> | South China Wuliang Mountain | HCB18 |
| TBD | <i>Trachypithecus crepusculus</i> | South China Wuliang Mountain | RML23 |

|     |                         |                                   |        |
|-----|-------------------------|-----------------------------------|--------|
| TBD | <i>Macaca arctoides</i> | South China Wuliang Mountain      | XBH16  |
| TBD | <i>Macaca arctoides</i> | South China Wuliang Mountain      | XNC09  |
| TBD | <i>Macaca arctoides</i> | South China Yongde Daxue Mountain | YDX401 |
| TBD | <i>Macaca sp.</i>       | South China Wuliang Mountain      | HCL19  |
| TBD | <i>Macaca sp.</i>       | South China Yongde Daxue Mountain | YDX208 |
| TBD | <i>Macaca sp.</i>       | South China Yongde Daxue Mountain | YDX209 |
| TBD | <i>Macaca sp.</i>       | South China Yongde Daxue Mountain | YDX212 |
| TBD | <i>Macaca sp.</i>       | South China Yongde Daxue Mountain | YDX602 |
| TBD | <i>Macaca sp.</i>       | South China Yongde Daxue Mountain | YDX604 |

## SUPPLEMENTAL FIGURES

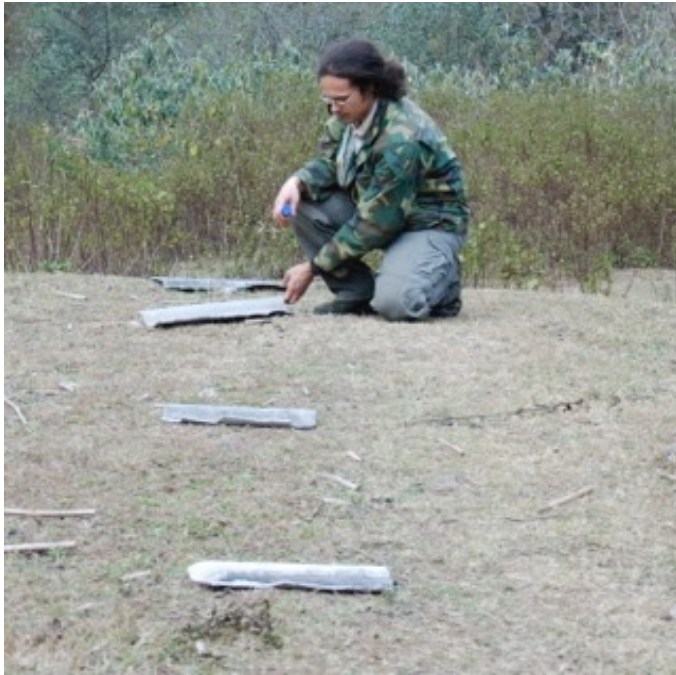

**Figure S1:** Multiple block test: Handler hiding *Nomascus* scat underneath the third in a sequence of tiles. The dog is then released to locate the scat. This test is easily modified for field conditions by substituting any available cover for the tiles or cinderblocks.
